# Supplementary material for: Palladium(ii)- and platinum(ii)phenyl-2,6-bis(oxazole) pincer complexes: Syntheses, crystal structures, and photophysical properties
Source: Royal Society of Chemistry journal article supplement (doi:10.1039/c1dt10369e), 2011-01-01

## Palladium(II)- and Platinum(II)phenyl-2,6-bis(oxazole) pincer complexes. Syntheses, crystal structures, and photophysical properties.

Gang Xu,<sup>a</sup> Quinli Luo,<sup>a</sup> Stefan Eibauer,<sup>a</sup> Andreas F. Rausch,<sup>b</sup> Sabine Stempfhuber,<sup>c</sup> Manfred Zabel,<sup>c</sup> Hartmut Yersin,<sup>\*b</sup> and Oliver Reiser<sup>\*a</sup>

### Supporting Information

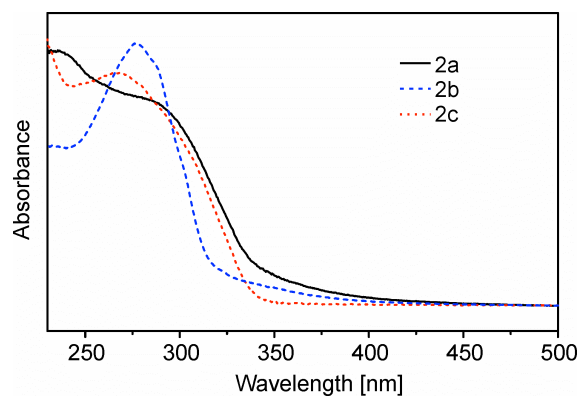

**Fig. S1.** Absorption spectra of the ligands **2a-2c** at ambient temperature in CH<sub>2</sub>Cl<sub>2</sub>.

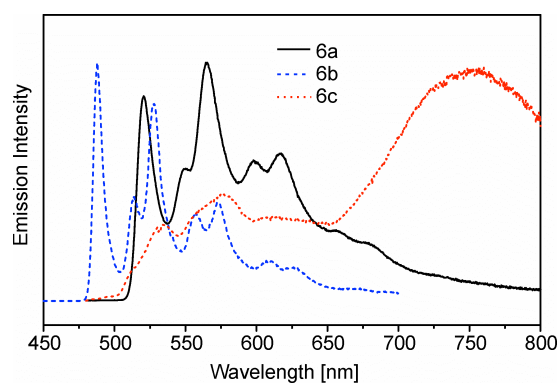

**Fig. S3.** Emission spectra of the Pd(II) compounds **6a-6c** at 77 K in ethanol.

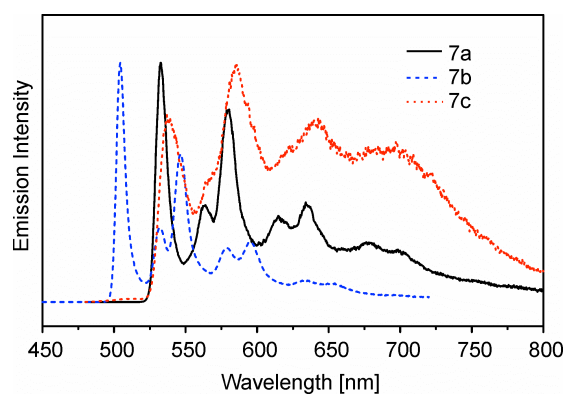

**Fig. S3.** Emission spectra of the Pt(II) compounds **7a-7c** at 77 K in ethanol.

**Table 1.** Crystal data and structure refinements for compounds **6a**, **6c**, **7a** and **7c**.

| Compound                                                                            | <b>6a</b>                                                          | <b>6c</b>                                                          | <b>7a</b>                                                          | <b>7b</b>                                                          |
|-------------------------------------------------------------------------------------|--------------------------------------------------------------------|--------------------------------------------------------------------|--------------------------------------------------------------------|--------------------------------------------------------------------|
| Empirical formula                                                                   | C <sub>16</sub> H <sub>15</sub> BrN <sub>2</sub> O <sub>4</sub> Pd | C <sub>16</sub> H <sub>13</sub> BrN <sub>2</sub> O <sub>5</sub> Pd | C <sub>16</sub> H <sub>15</sub> BrN <sub>2</sub> O <sub>4</sub> Pt | C <sub>16</sub> H <sub>13</sub> BrN <sub>2</sub> O <sub>5</sub> Pt |
| Formula weight                                                                      | 485.62                                                             | 499.60                                                             | 574.28                                                             | 588.26                                                             |
| Crystal size (mm)                                                                   | 0.32 x 0.20 x 0.08                                                 | 0.30 x 0.26 x 0.14                                                 | 0.48 x 0.12 x 0.02                                                 | 0.49 x 0.21 x 0.12                                                 |
| Crystal description                                                                 | prism                                                              | prism                                                              | rod                                                                | prism                                                              |
| Crystal colour                                                                      | light yellow                                                       | yellow to orange                                                   | light yellow                                                       | yellow to orange                                                   |
| Crystal system                                                                      | monoclinic                                                         | triclinic                                                          | monoclinic                                                         | triclinic                                                          |
| Space group                                                                         | <i>P</i> 2 <sub>1</sub> / <i>c</i>                                 | <i>P</i> -1                                                        | <i>C</i> 2/ <i>c</i>                                               | <i>P</i> -1                                                        |
| <i>a</i> (Å)                                                                        | 7.5601(8)                                                          | 9.6564(11)                                                         | 33.697(4)                                                          | 9.6961(10)                                                         |
| <i>b</i> (Å)                                                                        | 9.3101(6)                                                          | 10.0610(12)                                                        | 5.2354(4)                                                          | 10.0725(10)                                                        |
| <i>c</i> (Å)                                                                        | 24.686(3)                                                          | 10.5897(12)                                                        | 19.994(2)                                                          | 10.4364(10)                                                        |
| $\alpha$ (°)                                                                        |                                                                    | 107.986(13)                                                        |                                                                    | 107.818(11)                                                        |
| $\beta$ (°)                                                                         | 90.828(12)                                                         | 112.136(12)                                                        | 96.702(14)                                                         | 111.729(11)                                                        |
| $\gamma$ (°)                                                                        |                                                                    | 100.062(13)                                                        |                                                                    | 99.999(12)                                                         |
| Volume (Å <sup>3</sup> )                                                            | 1737.4(3)                                                          | 855.5(2)                                                           | 3503.2(6)                                                          | 852.7(2)                                                           |
| <i>Z</i>                                                                            | 4                                                                  | 2                                                                  | 8                                                                  | 2                                                                  |
| <i>d</i> (calc.) (Mg/m <sup>3</sup> )                                               | 1.857                                                              | 1.939                                                              | 2.178                                                              | 2.291                                                              |
| $\mu$ (mm <sup>-1</sup> )                                                           | 3.390                                                              | 3.449                                                              | 10.313                                                             | 10.600                                                             |
| <i>F</i> (000)                                                                      | 952                                                                | 488                                                                | 2160                                                               | 552                                                                |
| Measurement device type                                                             | STOE-IPDS                                                          | STOE-IPDS                                                          | STOE-IPDS                                                          | STOE-IPDS                                                          |
| Measurement method                                                                  | rotation                                                           | rotation                                                           | rotation                                                           | rotation                                                           |
| Temperature (K)                                                                     | 173(1)                                                             | 173(1)                                                             | 173(1)                                                             | 173(1)                                                             |
| Wavelength (Å)                                                                      | 0.71073                                                            | 0.71073                                                            | 0.71073                                                            | 0.71073                                                            |
| monochromator                                                                       | graphite                                                           | graphite                                                           | graphite                                                           | graphite                                                           |
| $\Theta$ range (°)                                                                  | 3.18, 25.87                                                        | 2.41, 27.93                                                        | 2.26, 25.87                                                        | 2.25, 26.85                                                        |
| Refl. collected/unique                                                              | 19590 / 3360                                                       | 10880 / 3756                                                       | 6524 / 1688                                                        | 10760 / 3422                                                       |
| <i>R</i> (int)                                                                      | 0.0360                                                             | 0.0326                                                             | 0.0834                                                             | 0.0339                                                             |
| Reflections <i>I</i> >2 $\sigma$ ( <i>I</i> )                                       | 2905                                                               | 3258                                                               | 1450                                                               | 3092                                                               |
| Absorption correction                                                               | analytical                                                         | analytical                                                         | numerical                                                          | numerical                                                          |
| Max./min. transmission                                                              | 0.7642 / 0.4459                                                    | 0.7039 / 0.3711                                                    | 0.2564 / 0.1554                                                    | 0.3258 / 0.0539                                                    |
| Data/ parameters                                                                    | 3360 / 217                                                         | 3756 / 226                                                         | 1688 / 217                                                         | 3422 / 226                                                         |
| Goodness-of-fit on <i>F</i> <sup>2</sup>                                            | 0.969                                                              | 0.963                                                              | 1.021                                                              | 1.029                                                              |
| <i>R</i> <sub>1</sub> , <i>wR</i> <sub>2</sub> [ <i>I</i> >2 $\sigma$ ( <i>I</i> )] | 0.0226, 0.0560                                                     | 0.0238, 0.0580                                                     | 0.0461, 0.1225                                                     | 0.0233, 0.0563                                                     |
| <i>R</i> <sub>1</sub> , <i>wR</i> <sub>2</sub> (all data)                           | 0.0272, 0.0571                                                     | 0.0293, 0.0596                                                     | 0.0513, 0.1272                                                     | 0.0265, 0.0572                                                     |
| Residual density (eÅ <sup>-3</sup> )                                                | 0.680/-0.290                                                       | 0.466/-0.376                                                       | 1.792/-1.567                                                       | 0.676/-1.521                                                       |



7a

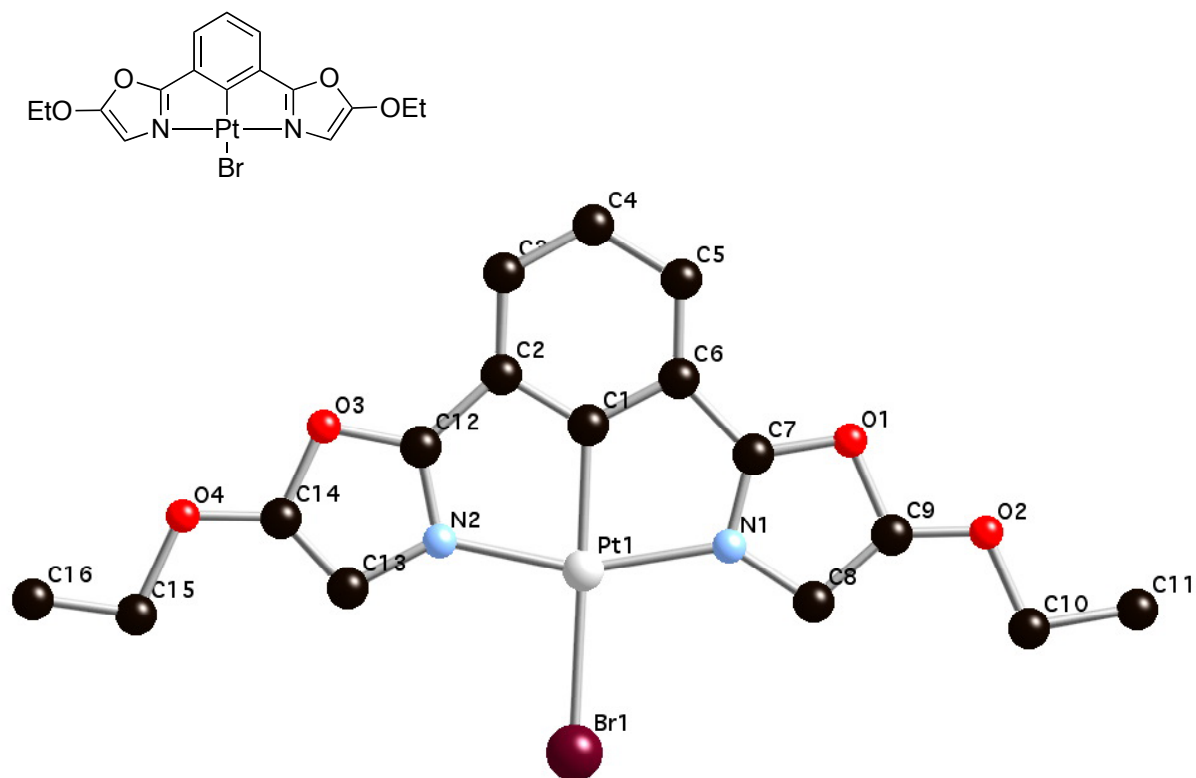

7c

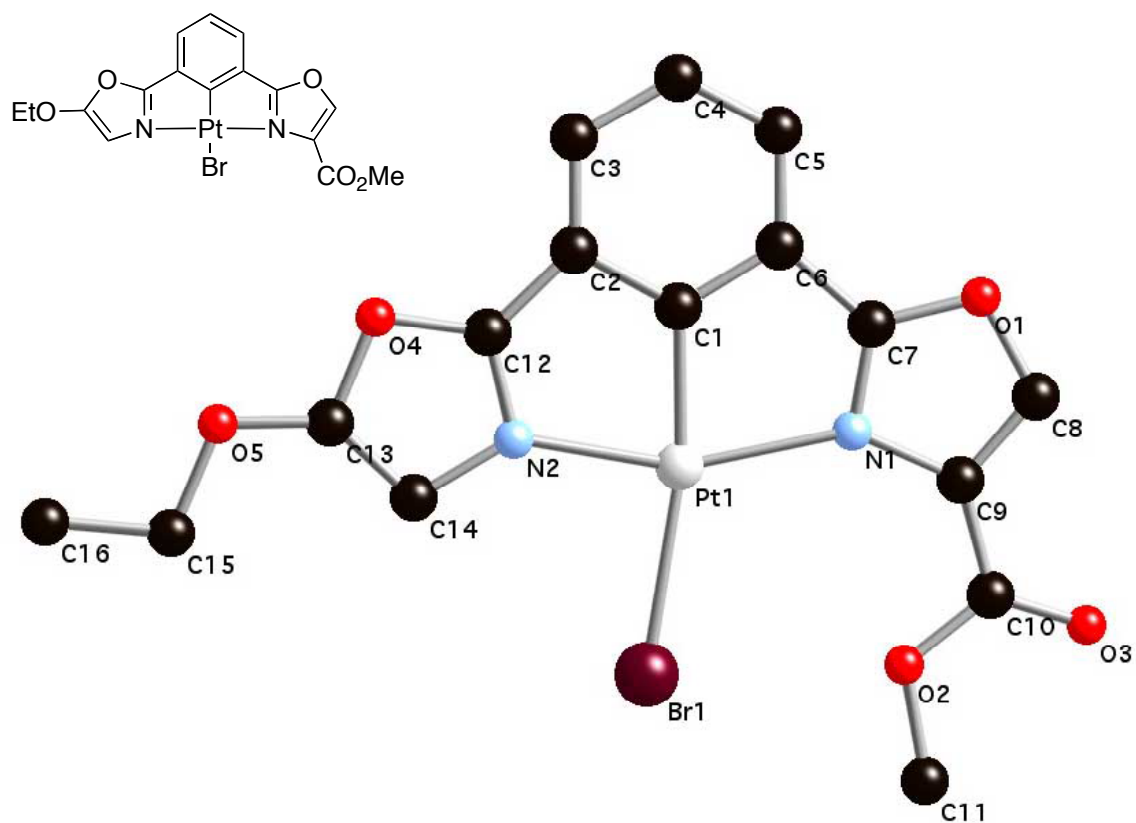

Supplement: c1dt10369e.pdf [file c1dt10369e.pdf]
